# Supplementary material for: Synergistic Effects of the RARalpha Agonist Tamibarotene and the Menin Inhibitor Revumenib in Acute Myeloid Leukemia Cells with KMT2A Rearrangement or NPM1 Mutation
Source: MDPI journal article supplement (doi:10.3390/cancers16071311), 2024-03-28
Supplement: s1 [file s1]

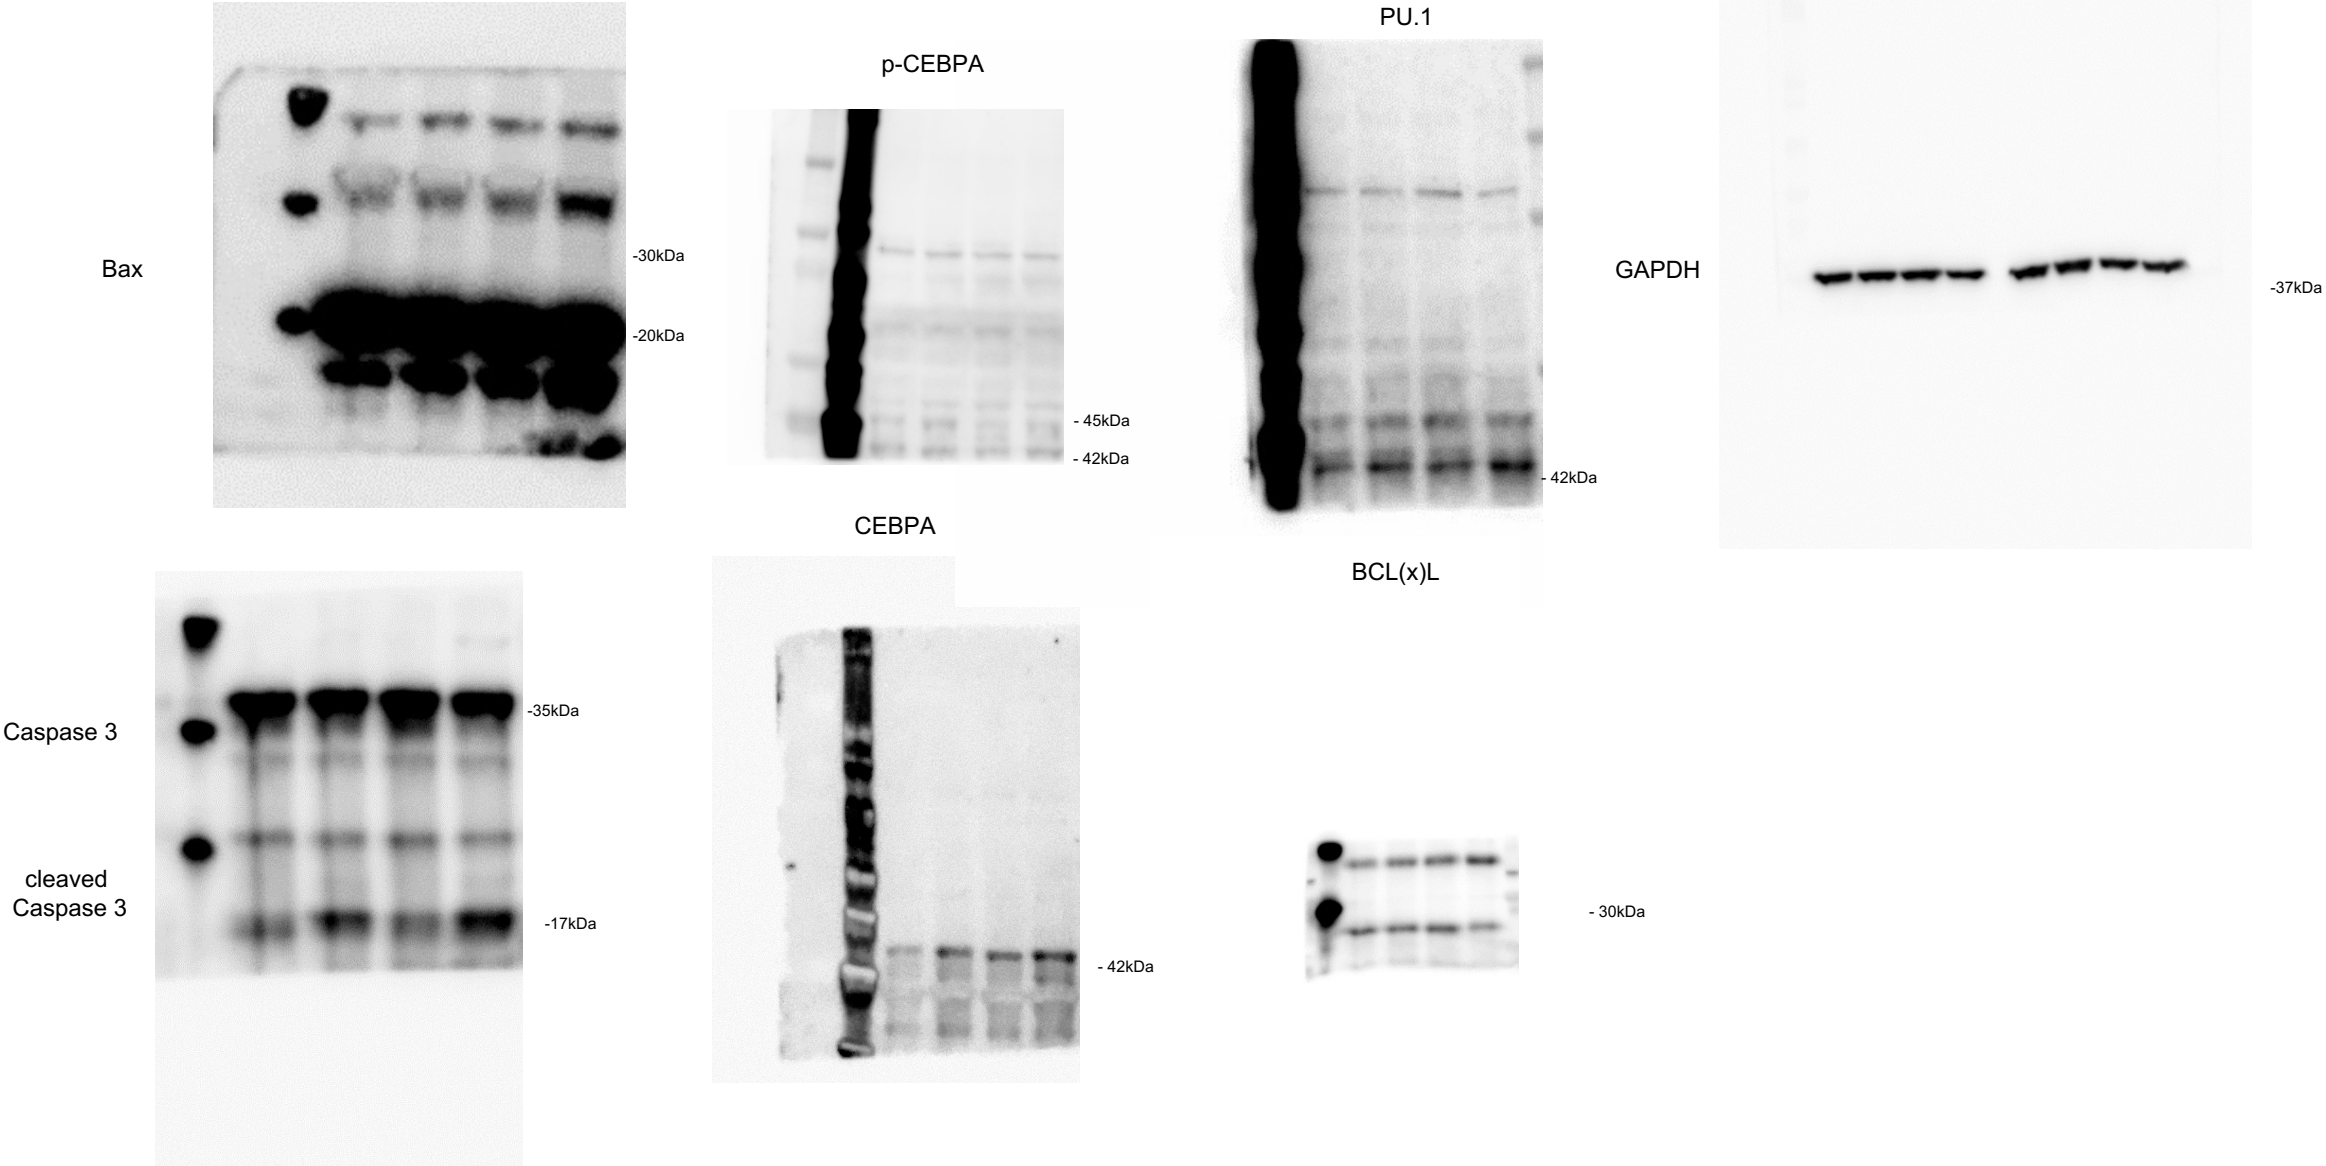

Figure 4

MOLM13 24h

Caspase 3

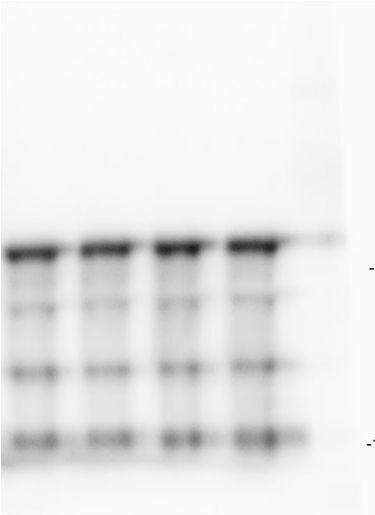

cleaved  
Caspase 3

-35kDa

-17kDa

PU.1

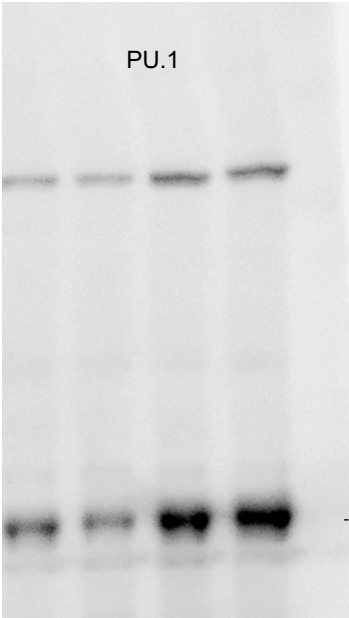

-42kDa

p-CEBPA

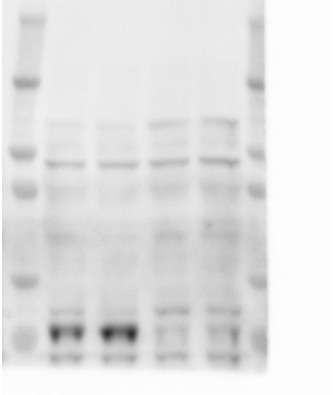

-45kDa

-42kDa

CEBPA

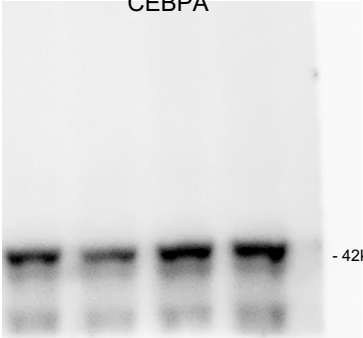

-42kDa

BCL-2

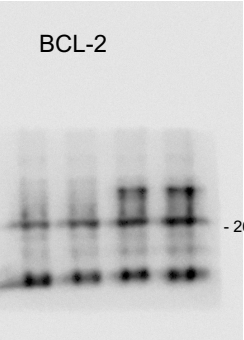

-26kDa

Bax

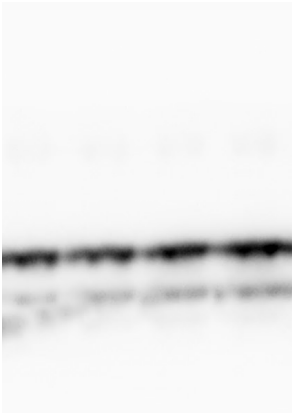

-20kDa

GAPDH

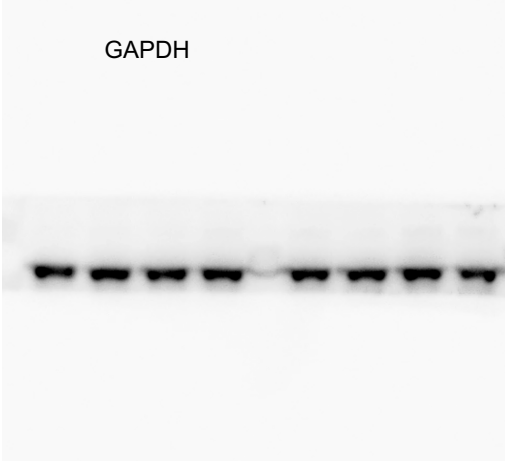

-37kDa

MOLM13 72h

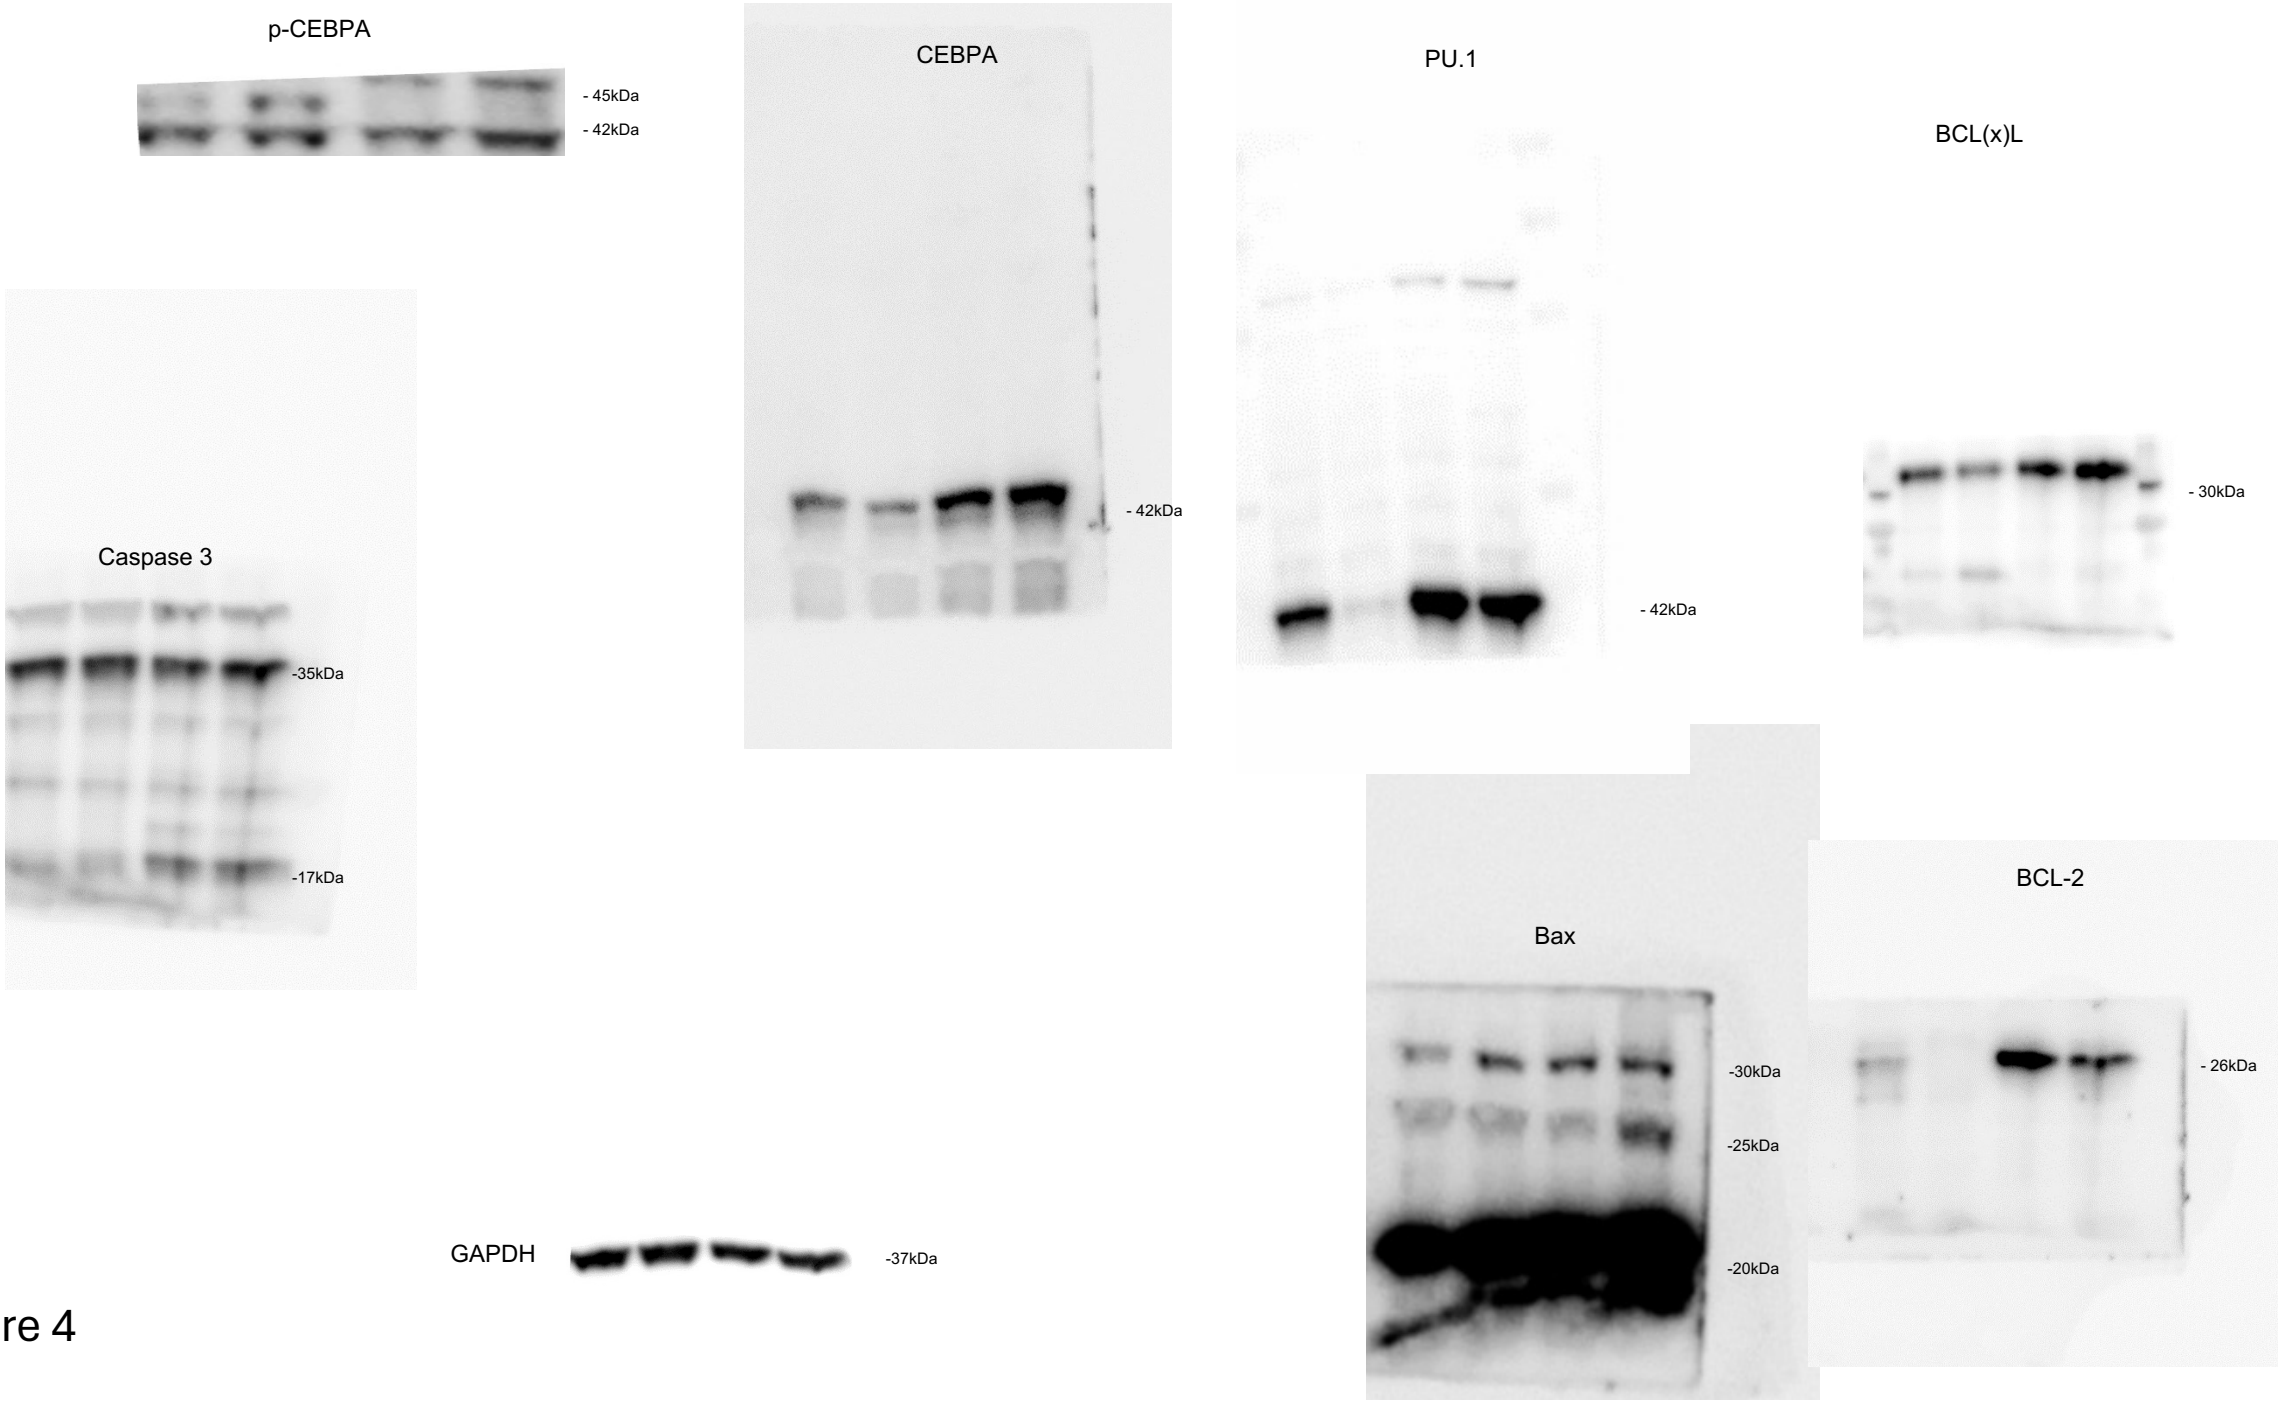

Figure 4

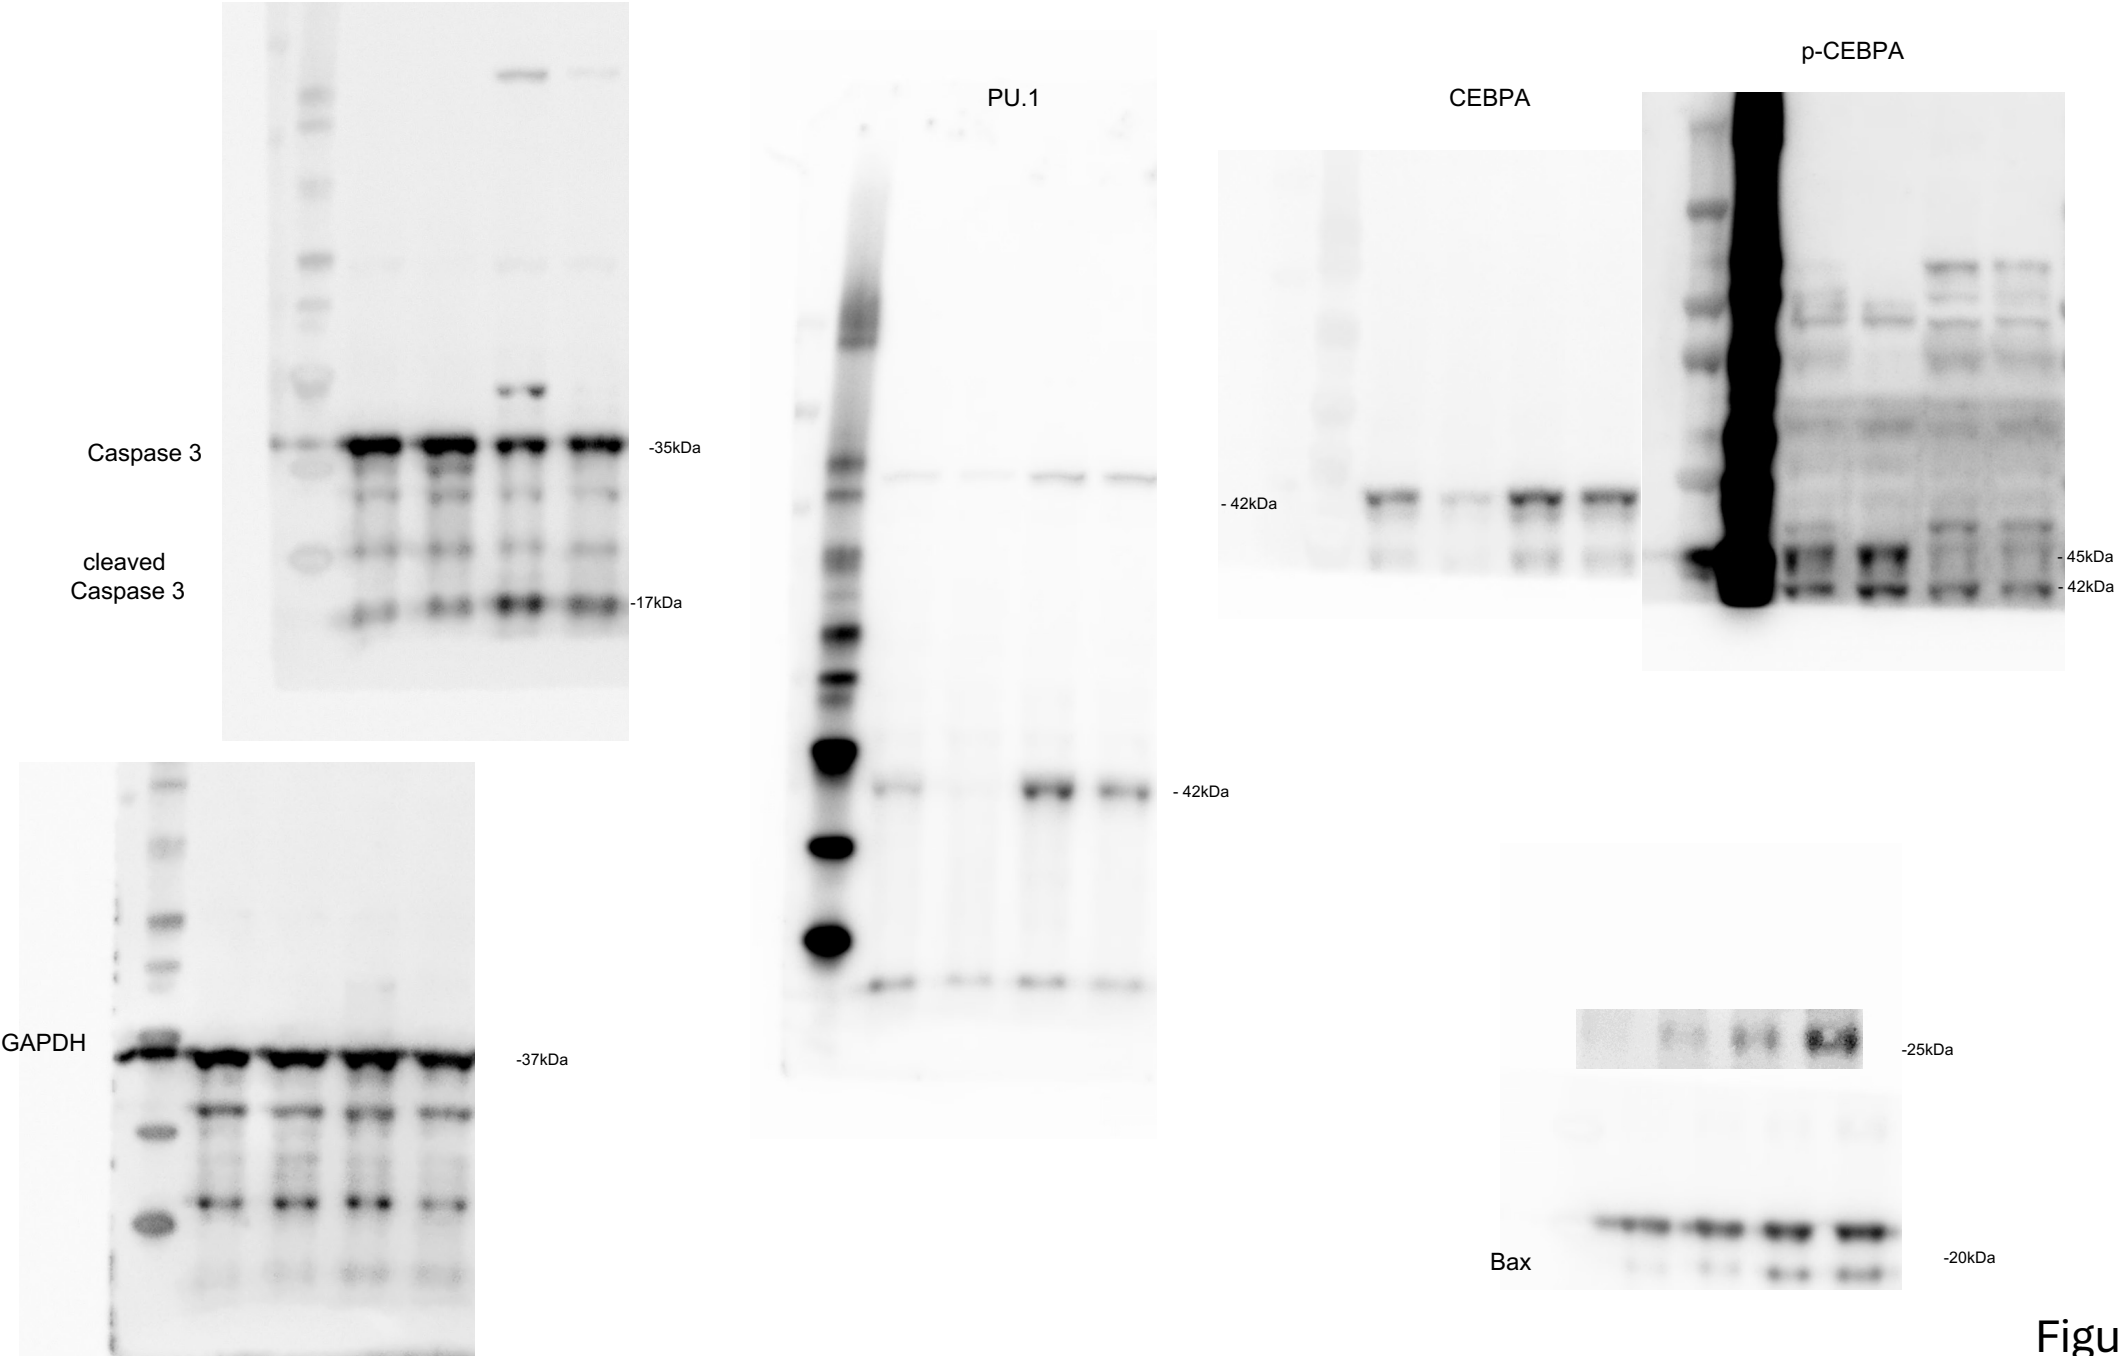

Figure 4



HL-60 72h

BCL-2

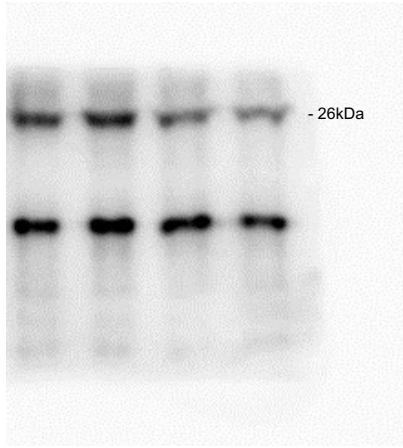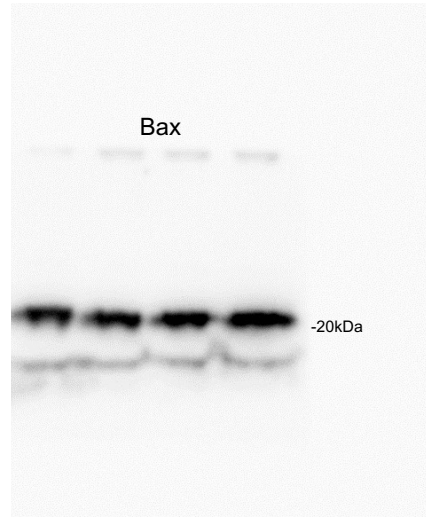

GAPDH

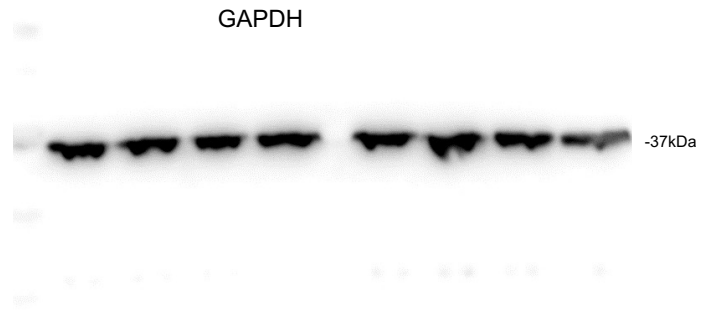

PU.1

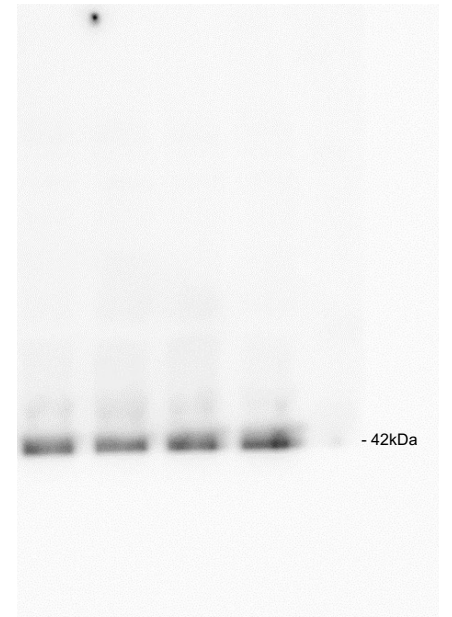

Caspase 3

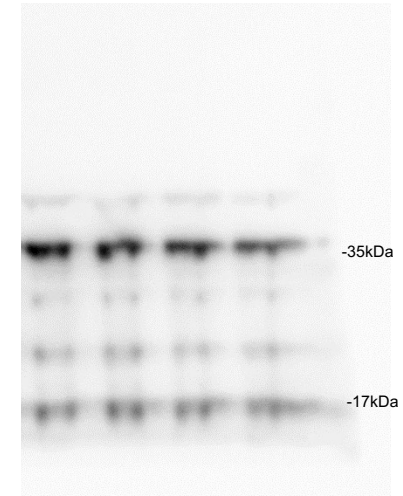

cleaved  
Caspase 3

-17kDa

Figure 4

#1

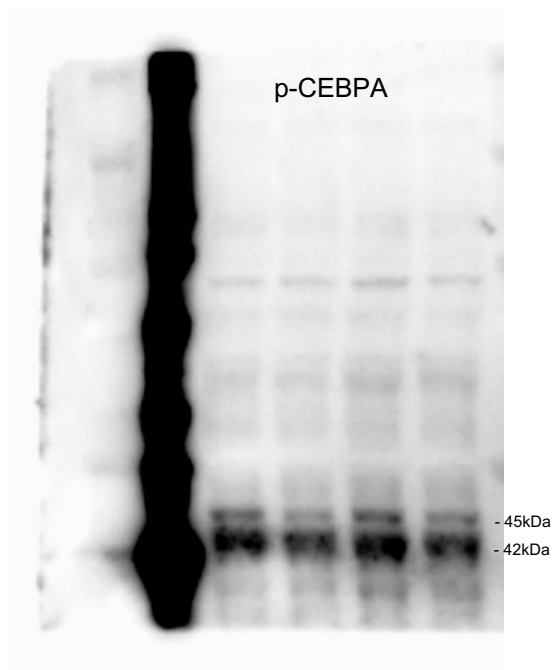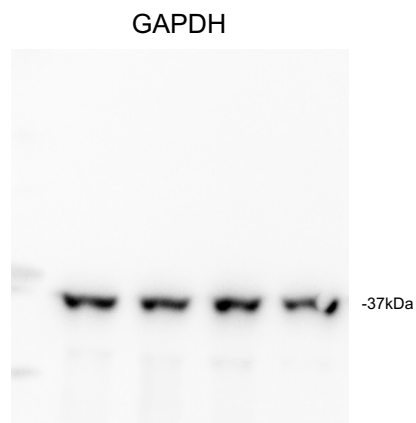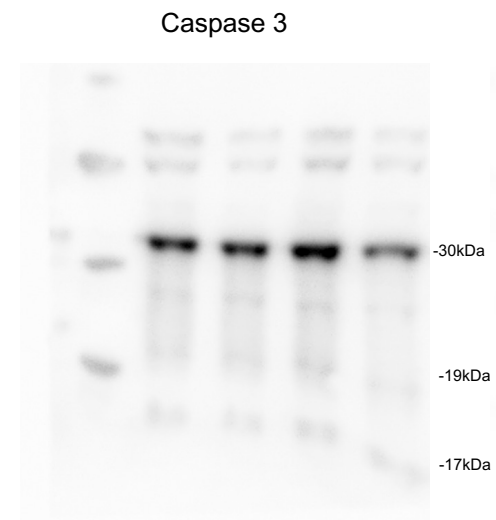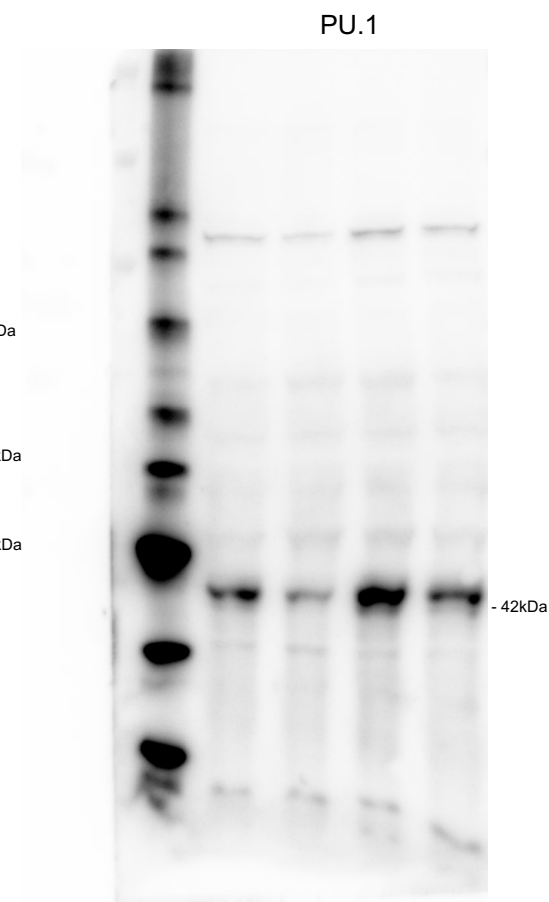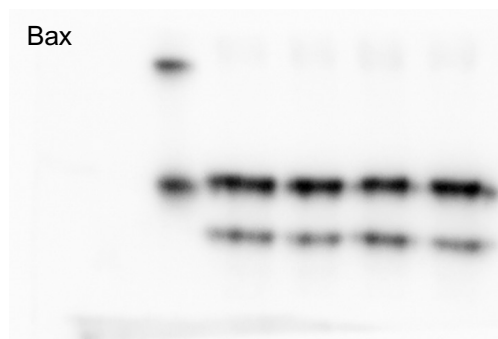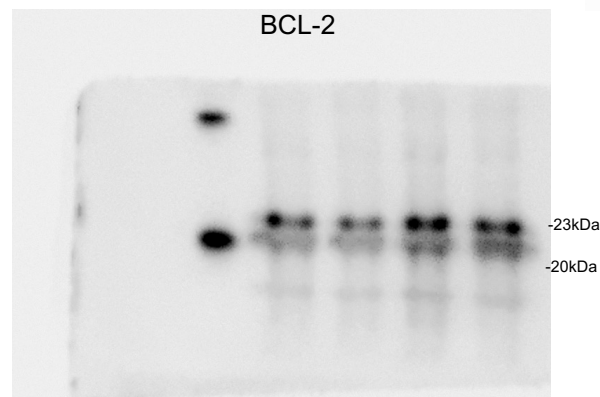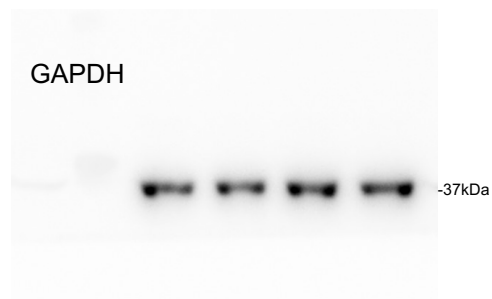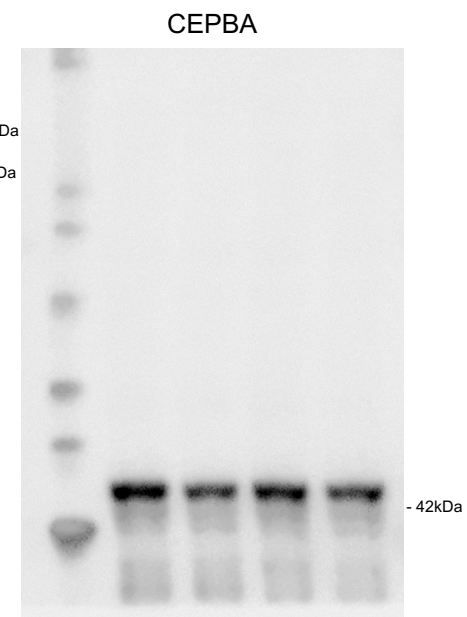

Figure 6

#5

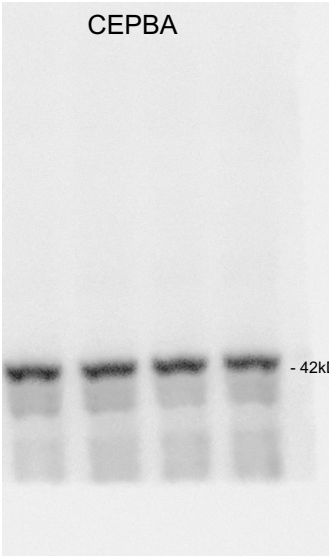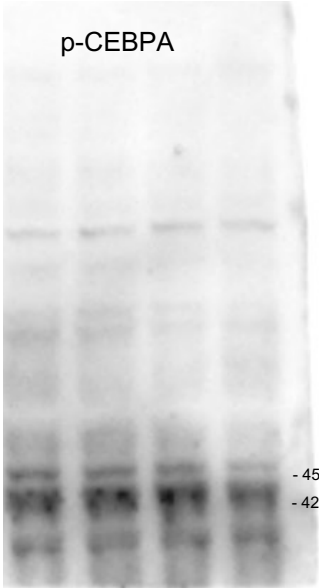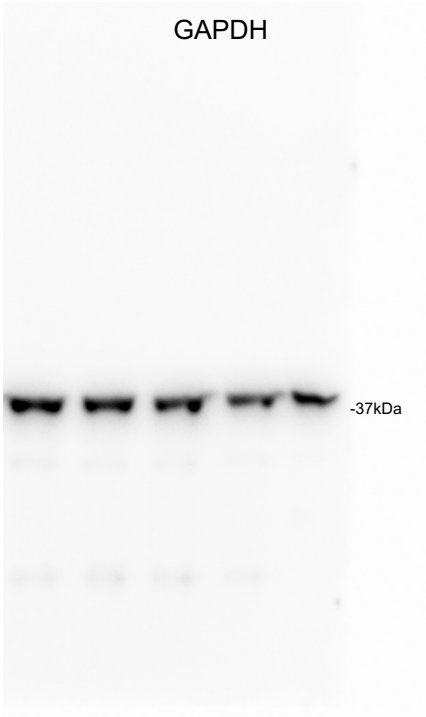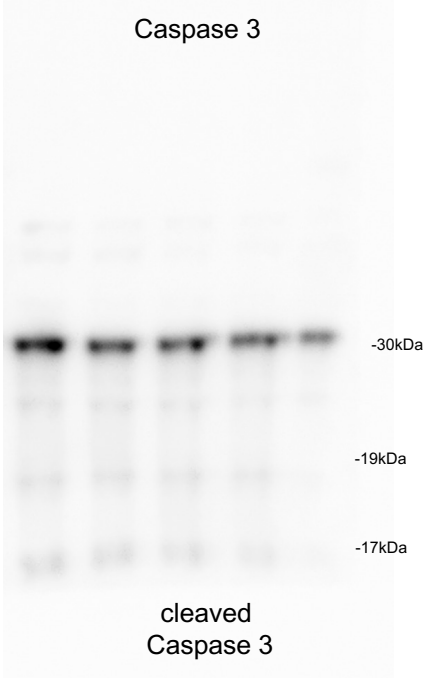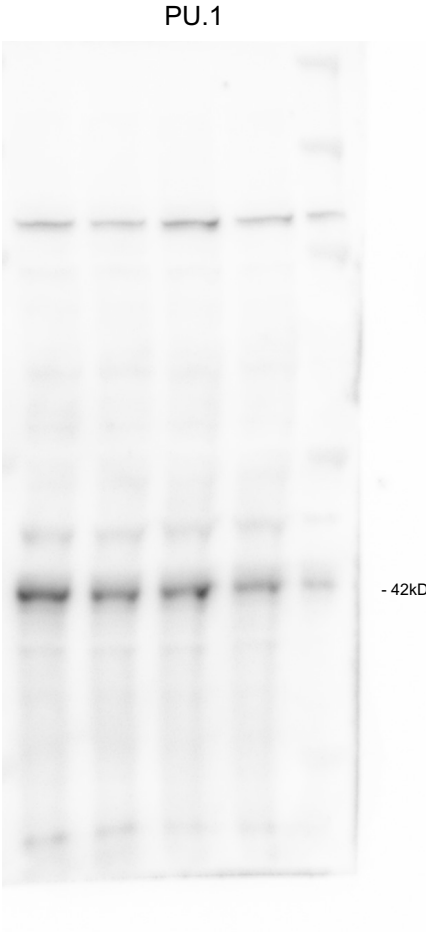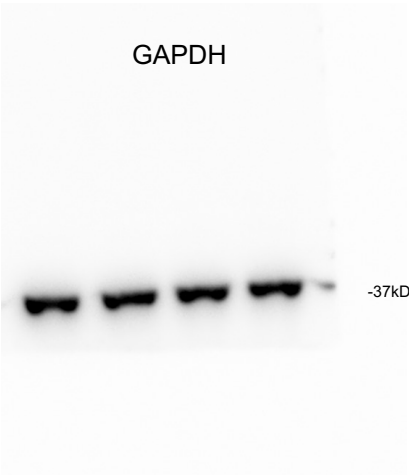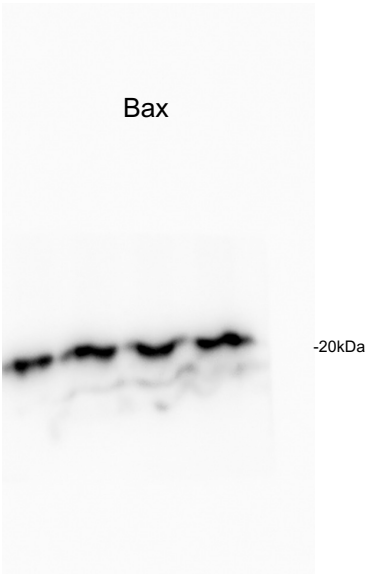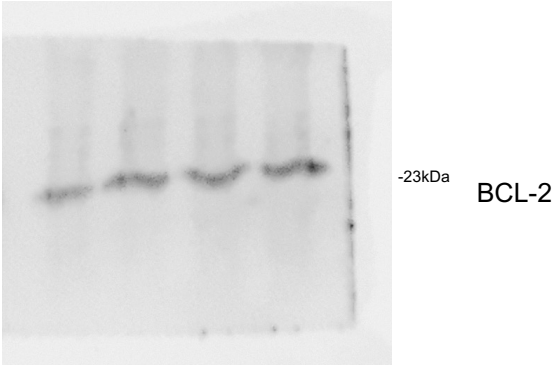

Figure 6

#3

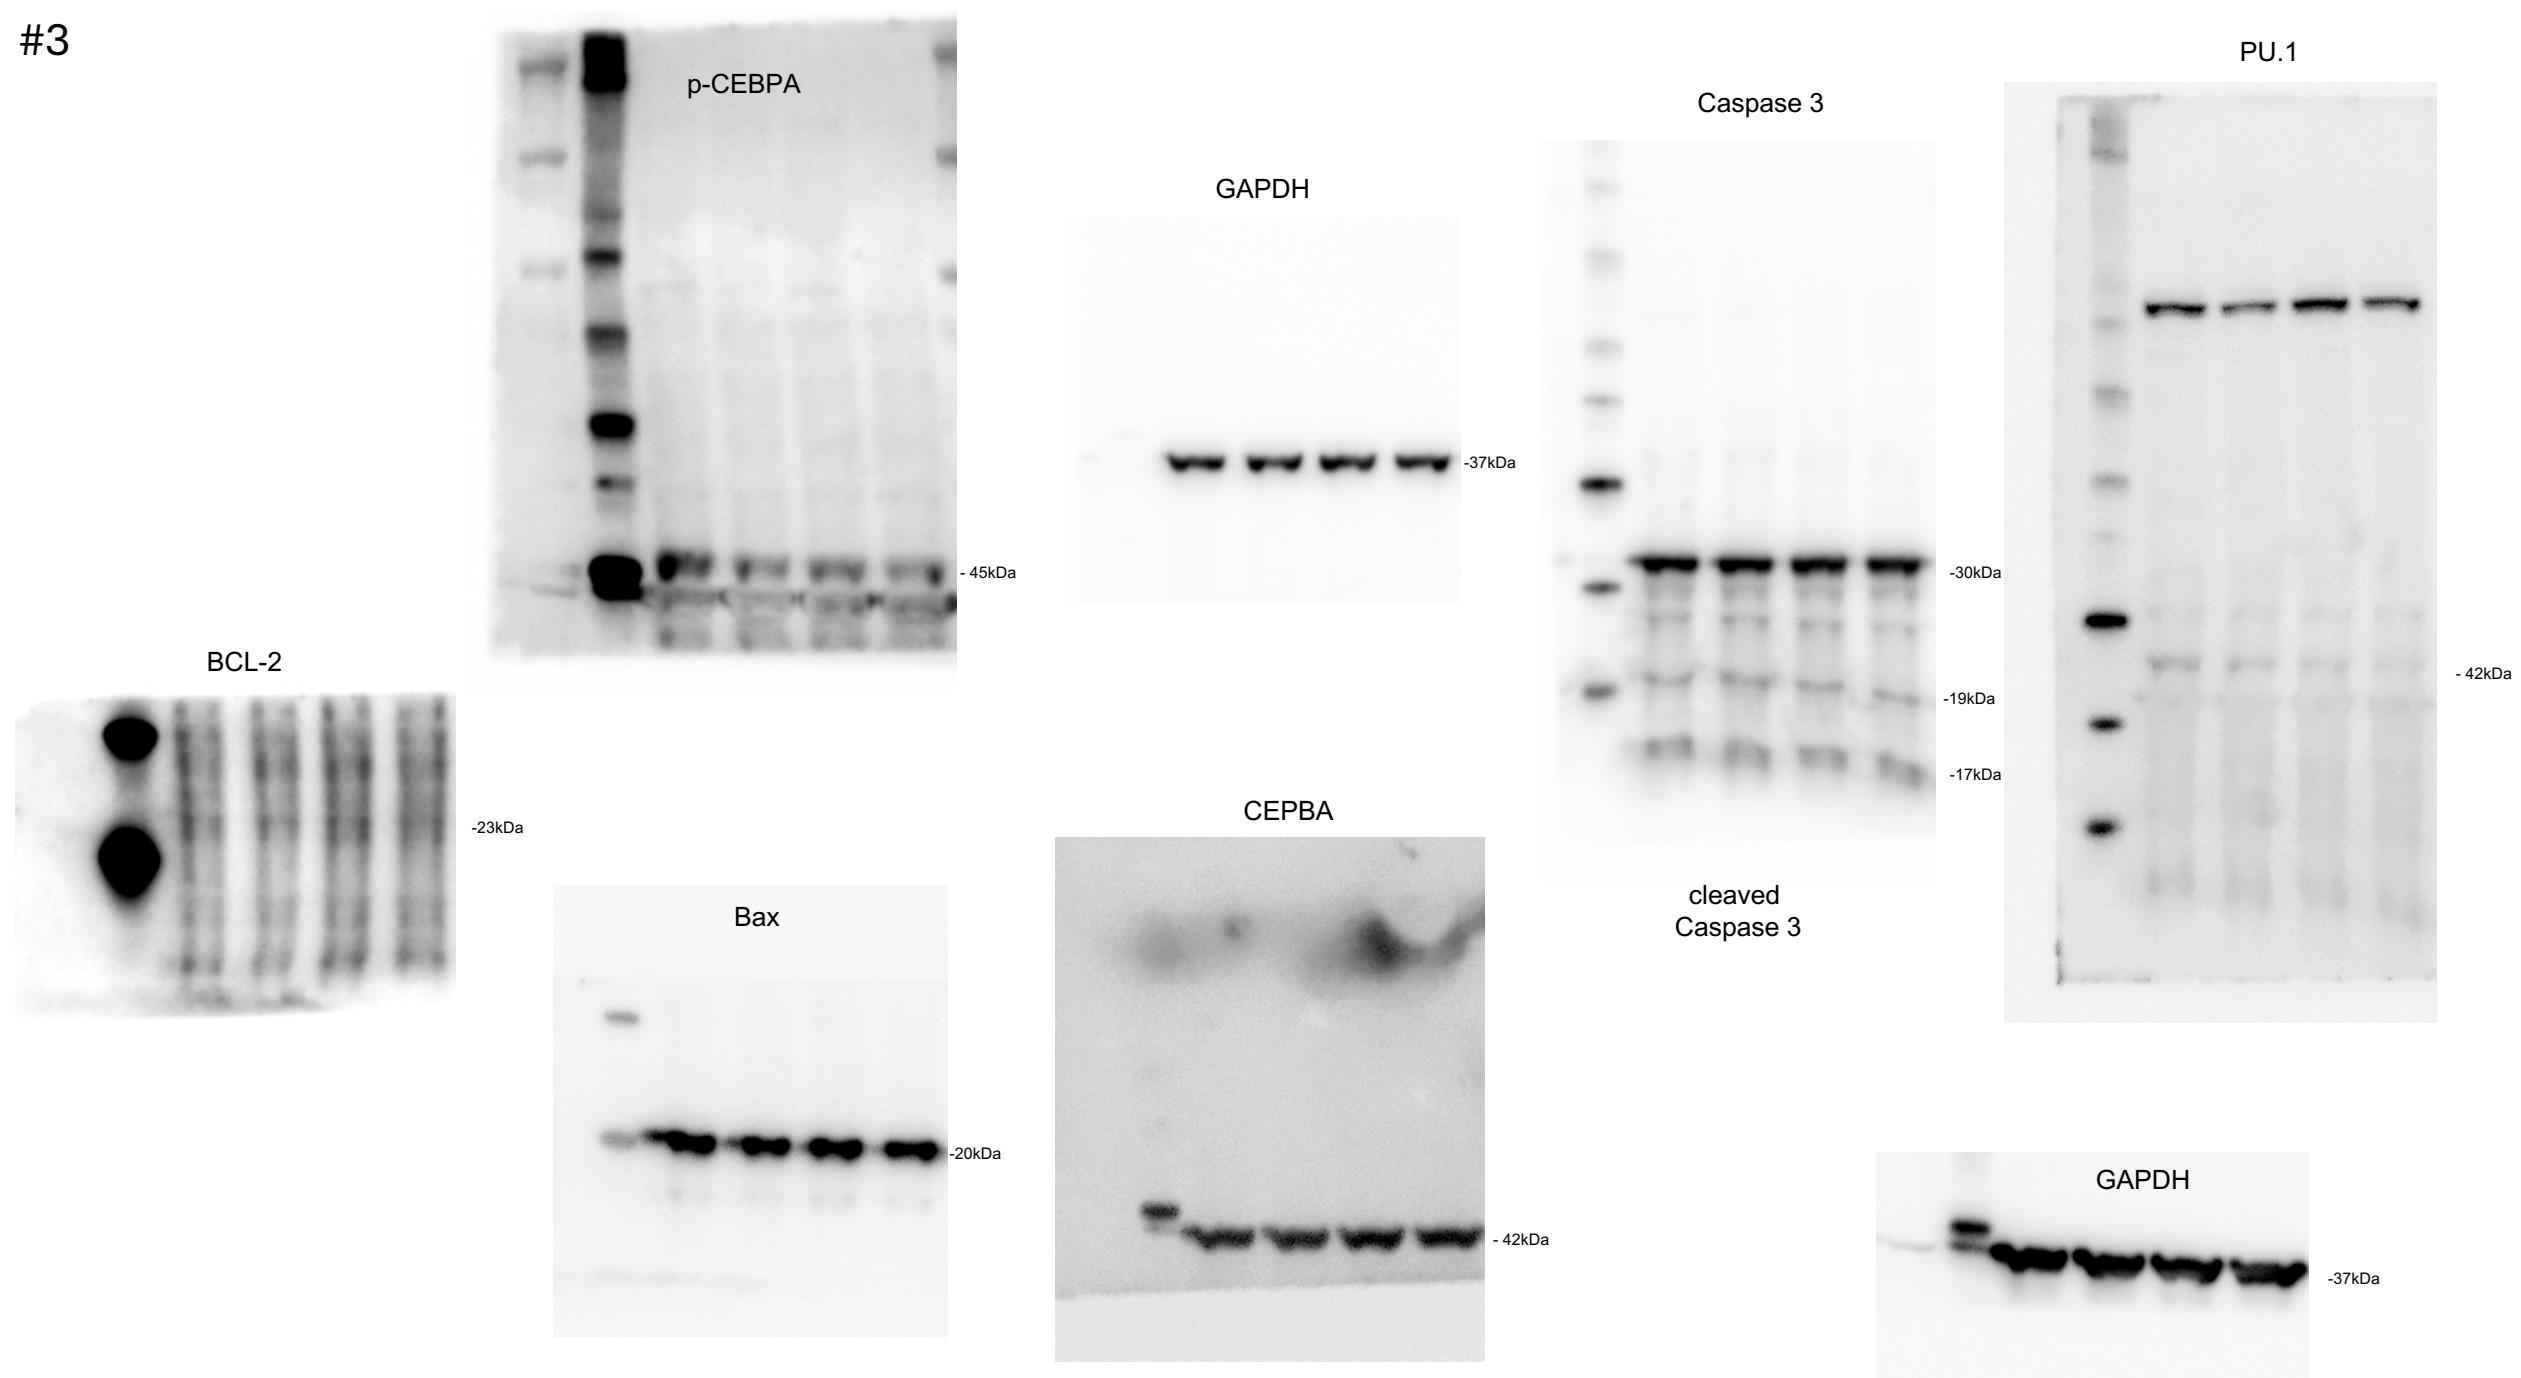

Figure 6

#4

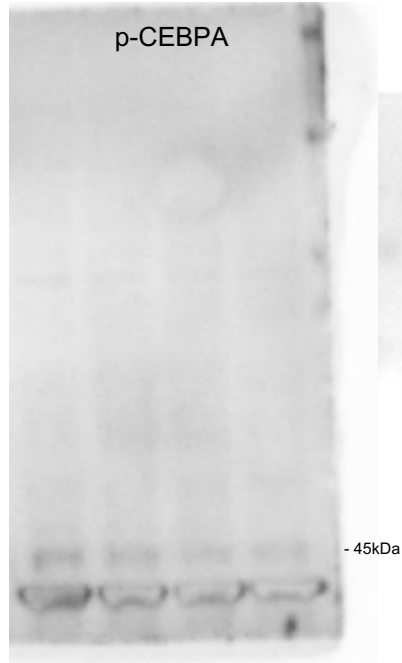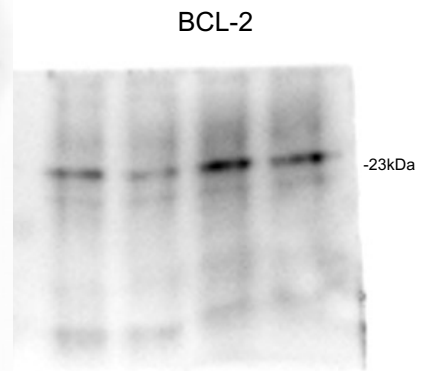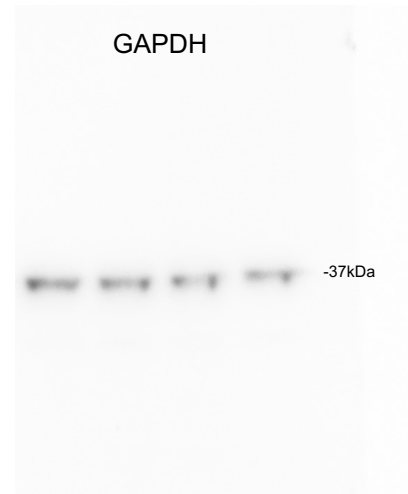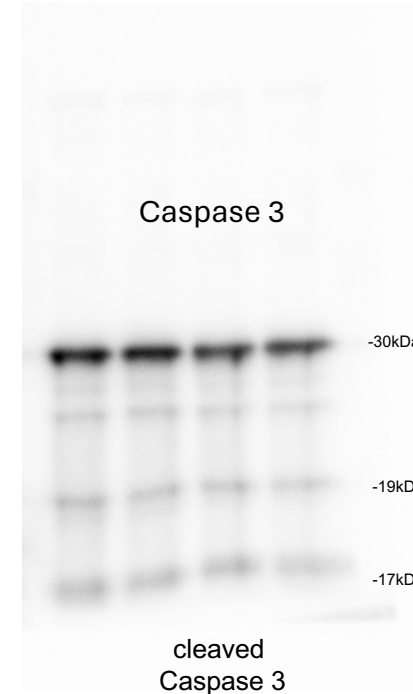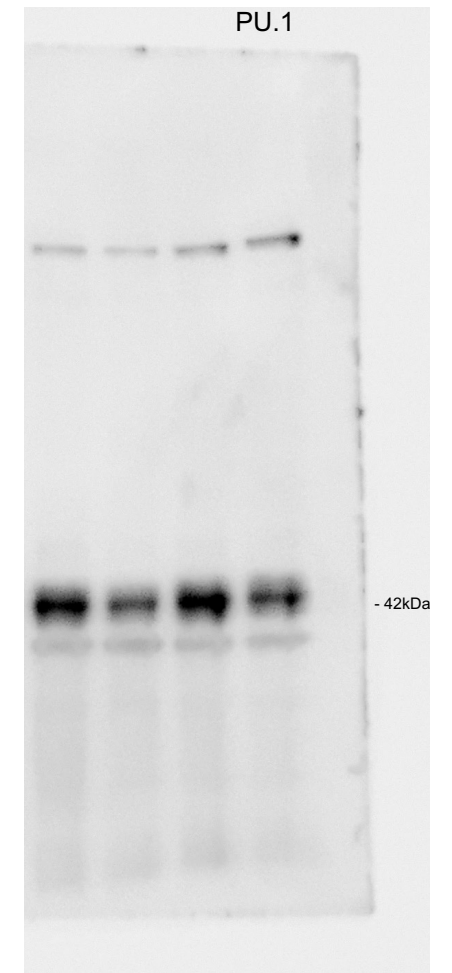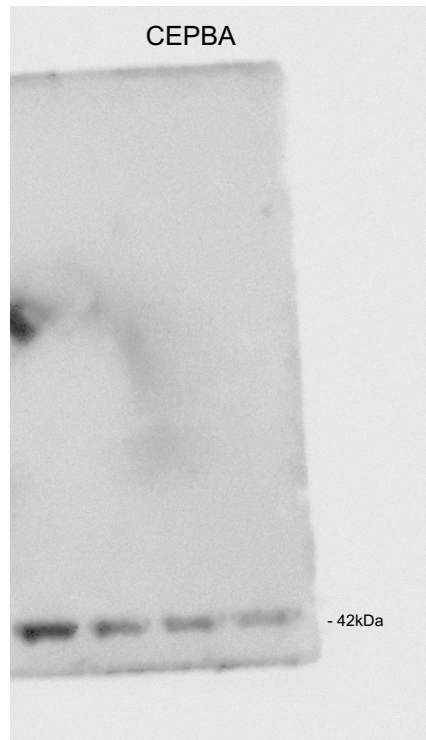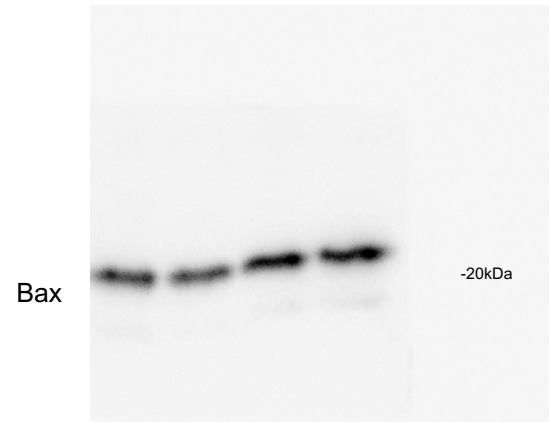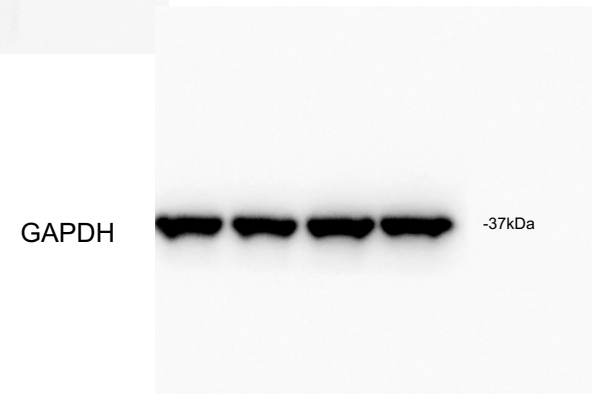

Figure 6
